# Supplementary material
Source: Springer Nature journal article supplement (https://www.springermedizin.de/resource/supplementary/13063_2013_1326_MOESM10_ESM.pdf/9619826)

## **Monitoring and Safety Committee (DMSC)**

### **Clinician**

- Prof. Daniel De Backer (Brussels)

### **Trialist**

- Prof. Kathy Rowan (London)

### **Biostatistician**

- Ass. prof. Jørgen Holm Petersen (Copenhagen)

## **Scientific Committee**

- Prof. Tim Walsh (University of Edinburgh)
- Prof. Jaques Lacroix (University of Montreal)
- Prof. Dean Fergusson (University of Ottawa)

## **Steering Committee**

**Anders Perner**, Prof., PhD, Dept. of Intensive Care, Copenhagen University Hospital, Rigshospitalet (Denmark) (principal investigator)

**Jan Wernerman**, Prof., PhD, Dept. of Intensive Care, Karolinska University Hospital Huddinge, Stockholm (Sweden)

**Anders Aneman**, Prof., PhD, Dept of Intensive Care, Liverpool Hospital, Sydney (Australia)

**Anne Berit Guttormsen**, Prof., PhD, Dept. of Intensive Care, Haukeland University Hospital and University of Bergen., Bergen(Norway)

**Sari Karlsson**, PhD, Dept. of Intensive Care, Tampere University Hospital, Finland (Finland)

**Gudmundur Klemzson**, MD, Dept of Intensive Care, Landspítali, Reykjavík, (Iceland)

**Nicolai Haase**, MD, PhD student, Dept. of Intensive Care, Rigshospitalet (Denmark)

**Lars Broksø Holst**, MD, PhD student, Dept. of Intensive Care, Rigshospitalet (Denmark)

**Pär Johansson**, MD, DMSc, Section for Transfusion Medicine, Copenhagen University Hospital, Rigshospitalet (Denmark)

**Jørn Wetterslev**, Chief physician, PhD, Copenhagen Trial Unit, Centre for Clinical Intervention Research, Copenhagen University Hospital, Rigshospitalet (Denmark)

## **Management Committee**

Lars Broksø Holst (coordinating investigator)

Nicolai Haase

Jørn Wetterslev

Anders Perner

## **National investigators**

Anders Perner

Jan Wernerman

Anne Berit Guttormsen

Sari Karlsson

Gudmundur Klemenzson

## **Site investigators**

DENMARK : 19 ICUs

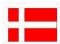

## **Site investigators**

ICELAND : pending

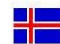

## **Site investigators**

SWEDEN : 6 ICUs

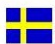

## **Site investigators**

NORWAY : 3 ICUs

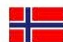

## **Site investigators**

FINLAND : 3

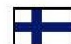

Supplement: MOESM10 [file 9619826]
